# Supplementary material for: Morley: Image Analysis and Evaluation of Statistically Significant Differences in Geometric Sizes of Crop Seedlings Responded to Biotic Stimulation
Source: Preprints.org preprint supplement (doi:10.20944/preprints202307.1090.v1), 2023-07-17
Supplement: Supplementary file 2 [file supplementary]

Archive with 1 entries (1 files):
- SI_r1.pdf
